# Supplementary material for: Burkholderia Bacteria Produce Multiple Potentially Novel Molecules that Inhibit Carbapenem-Resistant Gram-Negative Bacterial Pathogens
Source: MDPI journal article supplement (doi:10.3390/antibiotics10020147), 2021-02-02

**S1 Fig. Mass spectra and UV spectra of 42 metabolites detected in crude extracts of 14 *Burkholderia* isolates.** The upper panel represents the UV spectrum, the lower panel represents the mass spectrum in positive mode. Asterisks indicate putative novel molecules.

**C<sub>33</sub>H<sub>45</sub>Cl<sub>2</sub>NO<sub>11</sub> – Enacyloxin IIa or IIb**

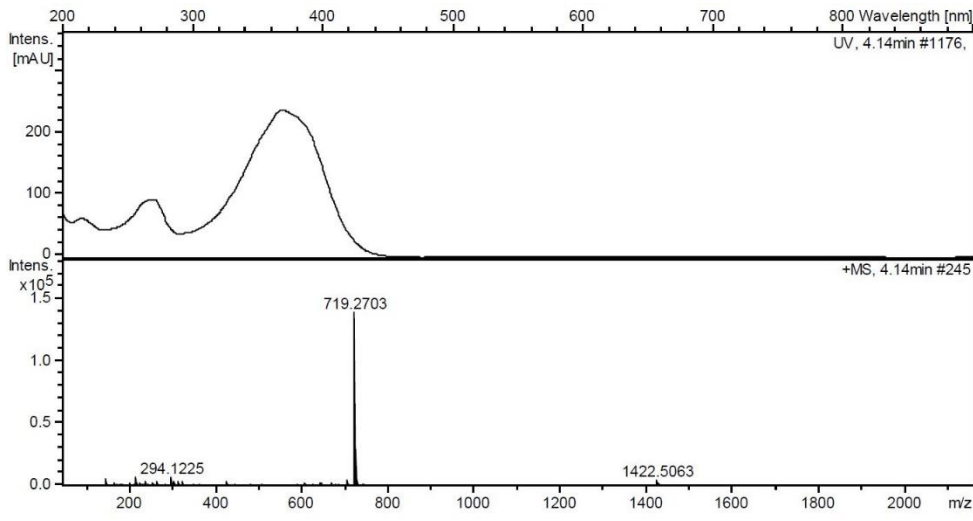

**C<sub>7</sub>H<sub>7</sub>N<sub>5</sub>O<sub>2</sub> – Toxoflavin**

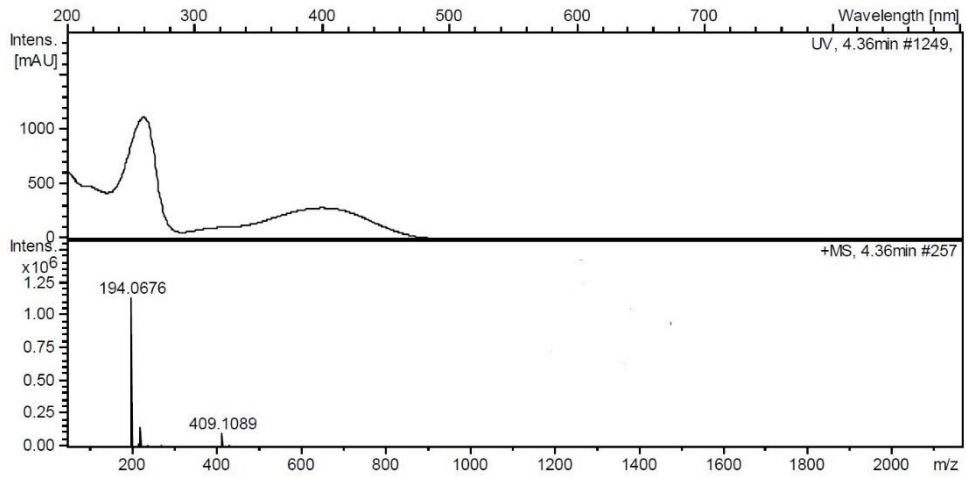

**C<sub>6</sub>H<sub>5</sub>N<sub>5</sub>O<sub>2</sub> – Reumycin**

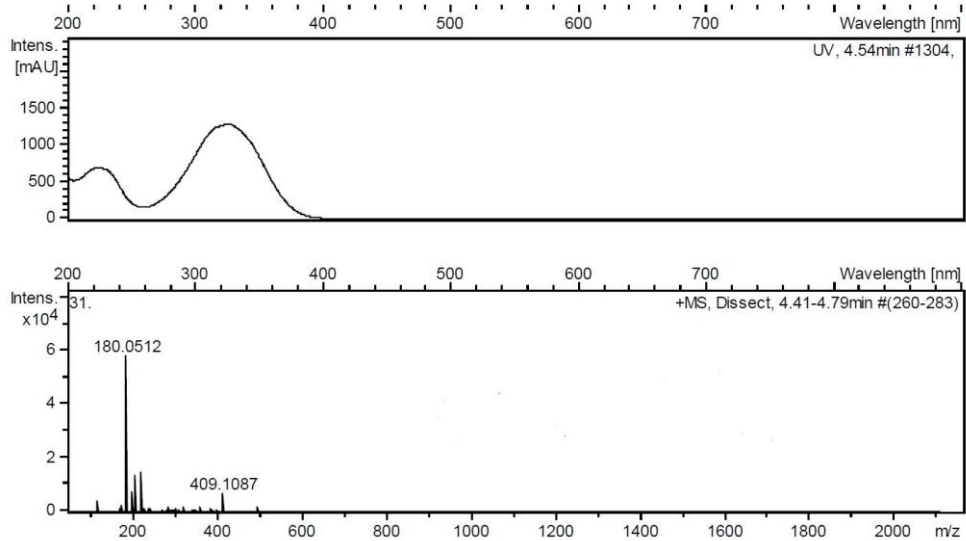

$C_{14}H_{20}Cl_2N_2O_6$  – Bactobolin A

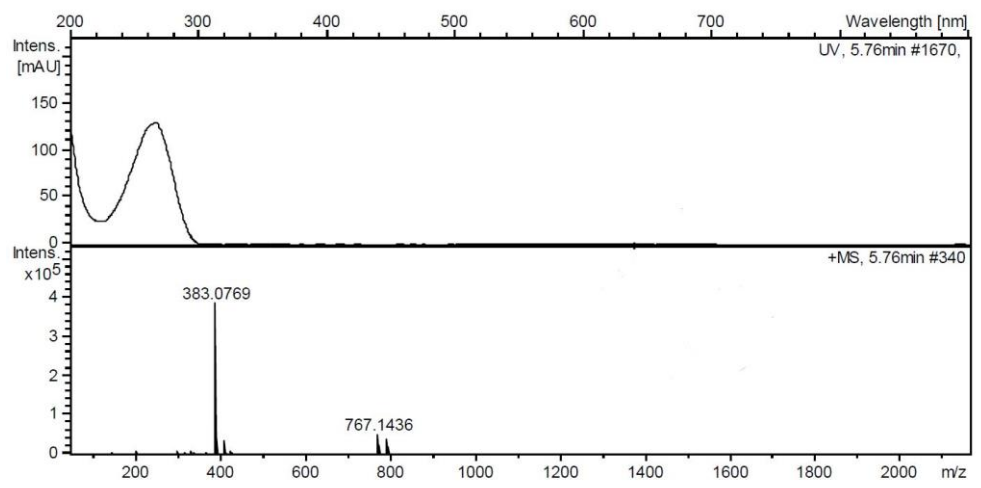

$C_{52}H_{85}N_{11}O_{22}$  – Cepacidin A1

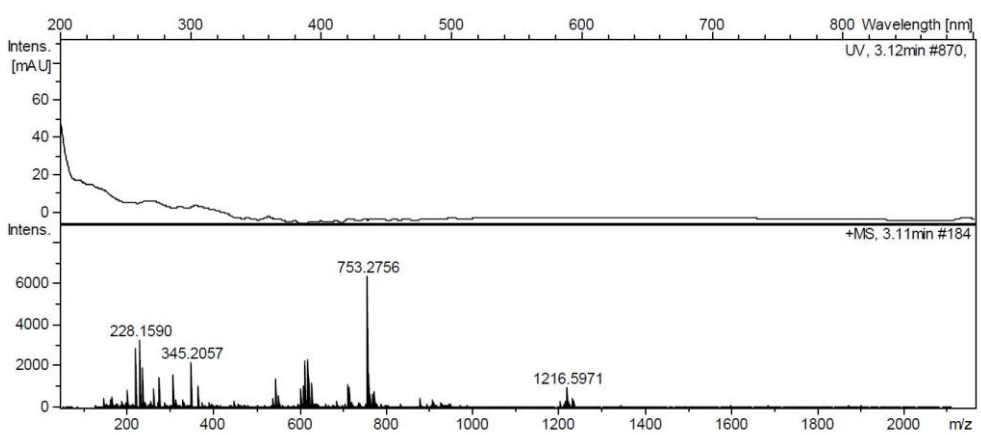

$C_{19}H_{25}NO$  – Antibiotic SF 2420B

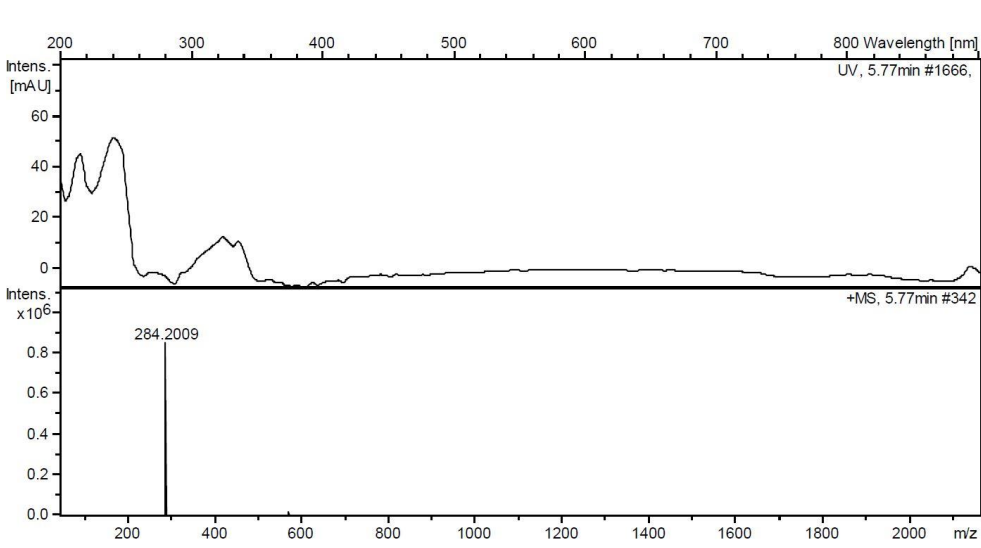

$C_{17}H_{21}NO$  – 2-(2-Heptenyl)-3-methyl-4(1H)-quinolinone

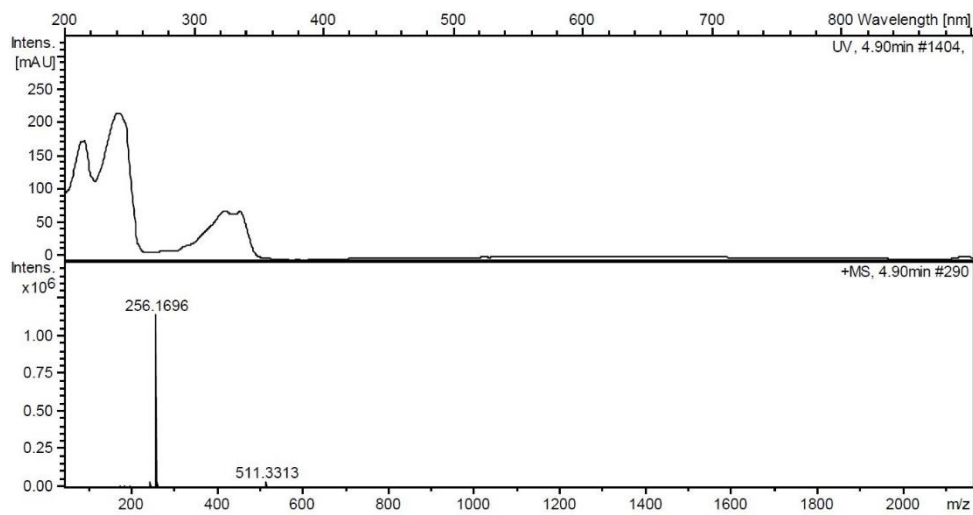

$C_{10}H_{12}N_5O_7P$  – Cyclic guanosine monophosphate (cGMP)

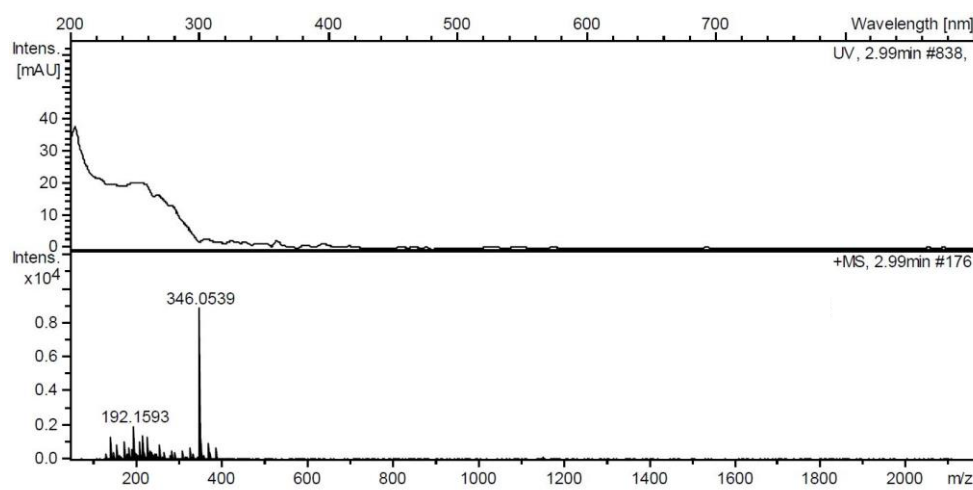

$C_8H_{11}NO_3$  – 2-Acetamido-4-hydroxy-2-cyclohexen-1-one

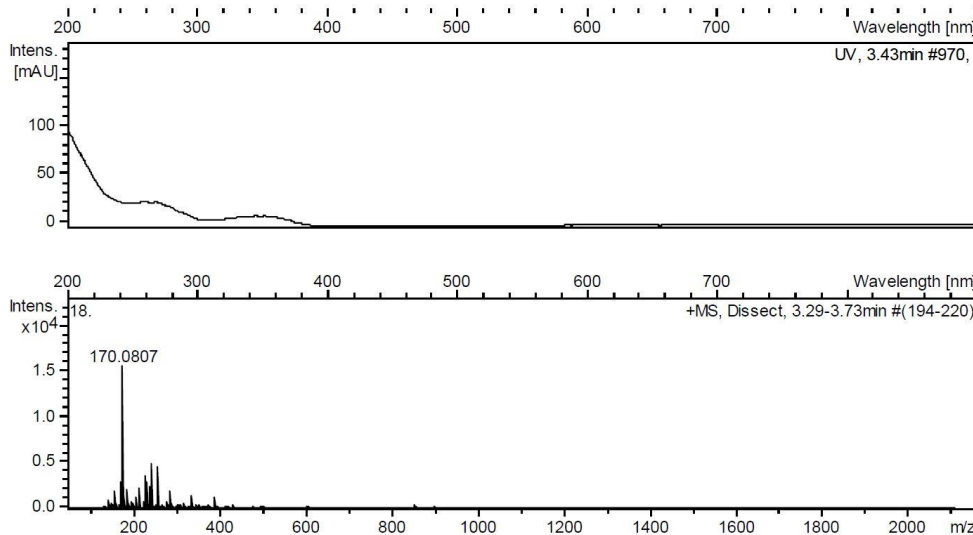

$C_{10}H_6Cl_2N_2O_2$  – Pyrrolnitrin

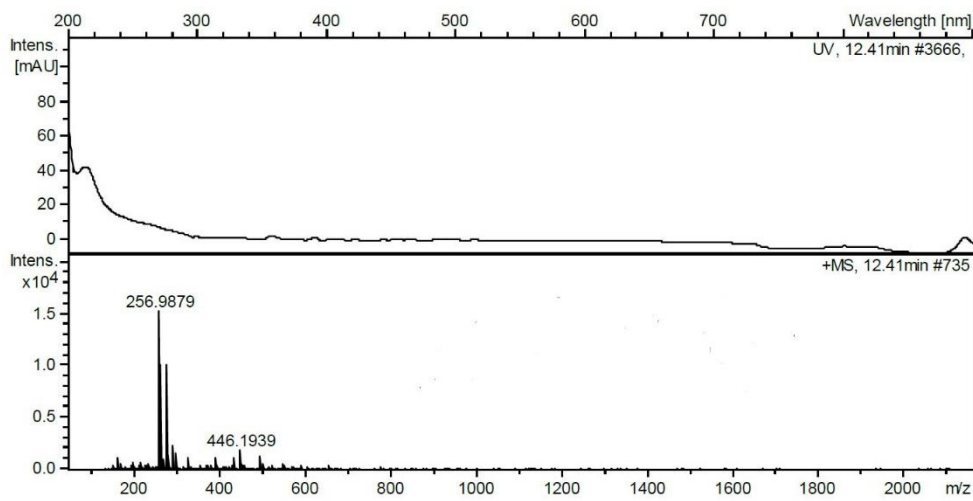

$C_{10}H_8Cl_2N_2$  – Aminopyrrolnitrin

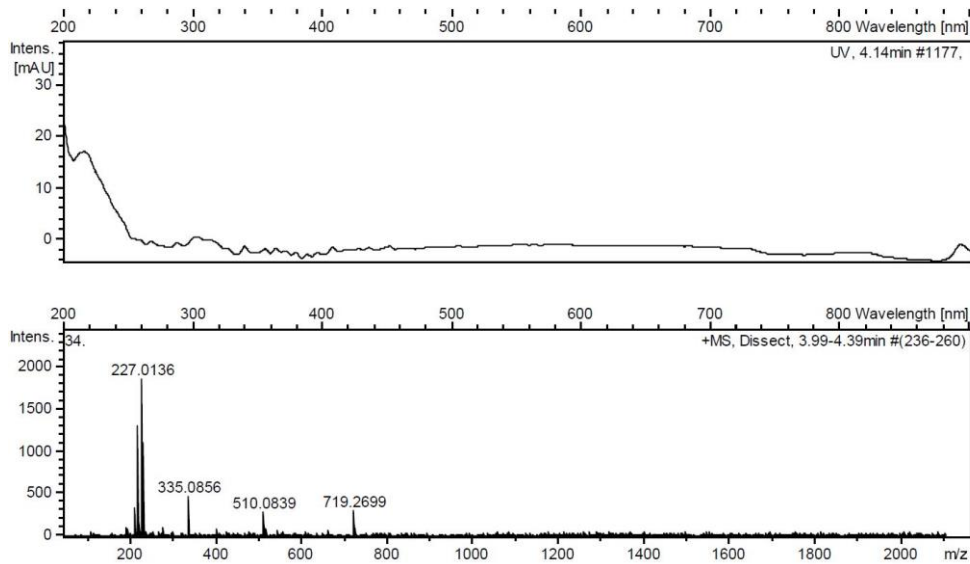

$C_{21}H_{24}FeN_3O_9$  – Antibiotic BN 227F

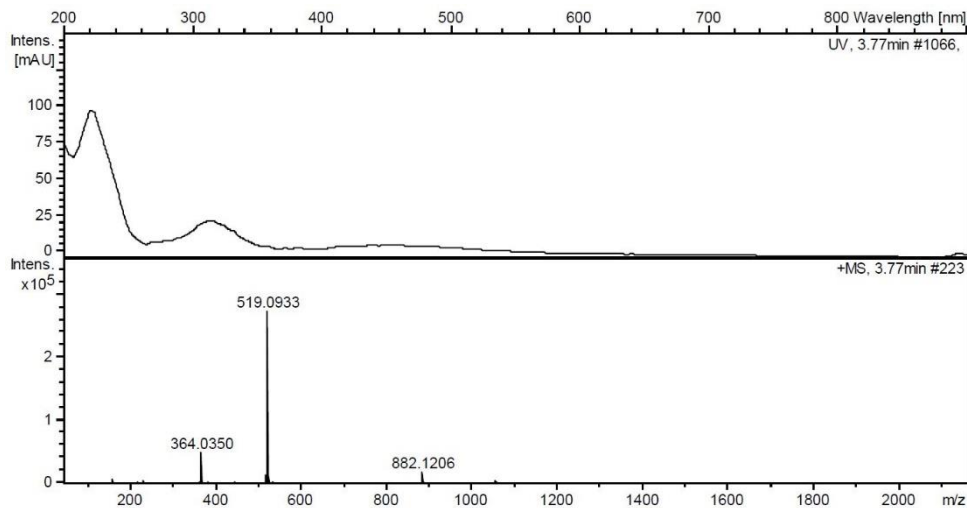

$C_7H_9NO_3$  – Cepabactin (= Antibiotic BN 227)

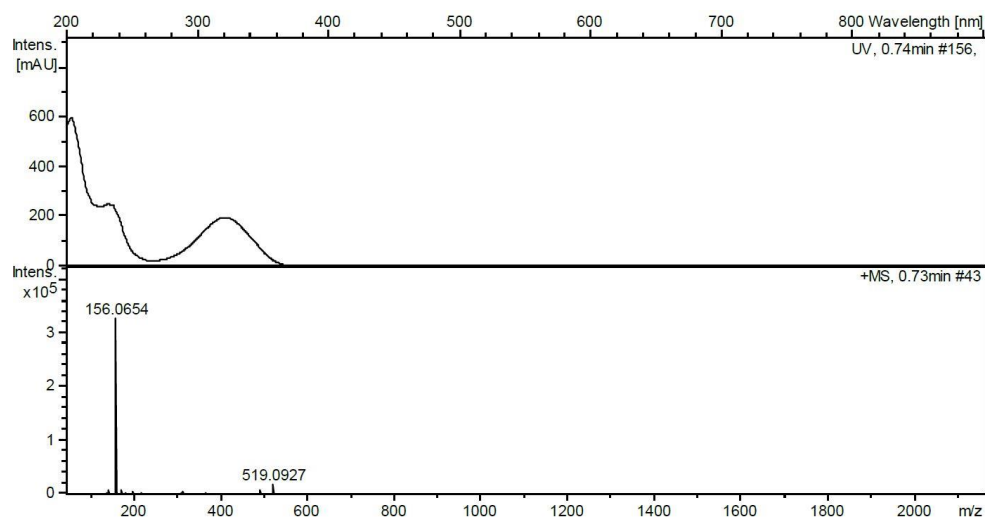

$C_{10}H_7NO_3S$  – Aeruginoic acid

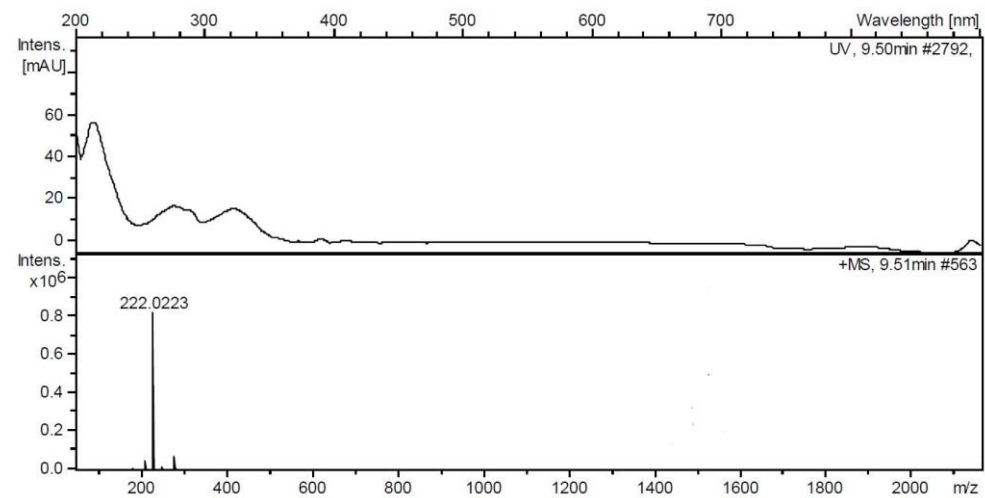

$C_{10}H_9NO_3S$  – Dihydroaeruginoic acid

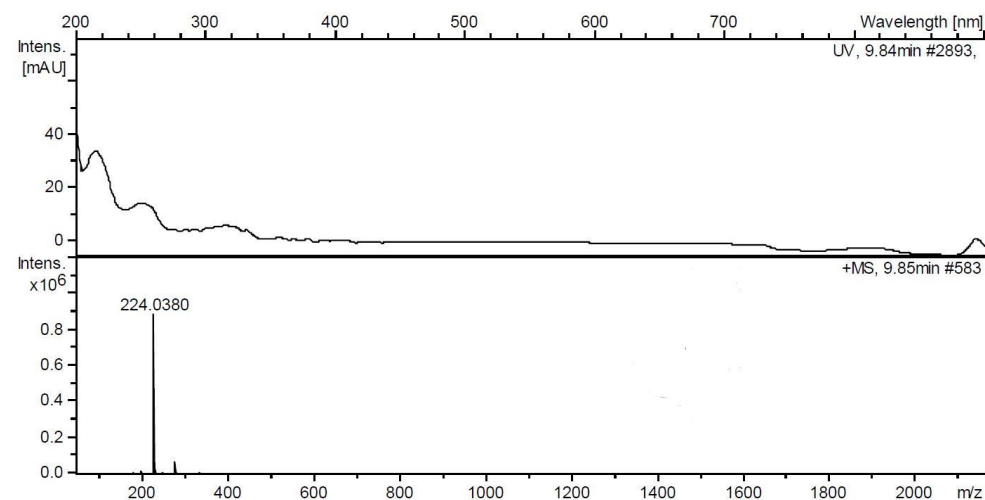

$C_{10}H_{11}NO_2S$  – Aerugine

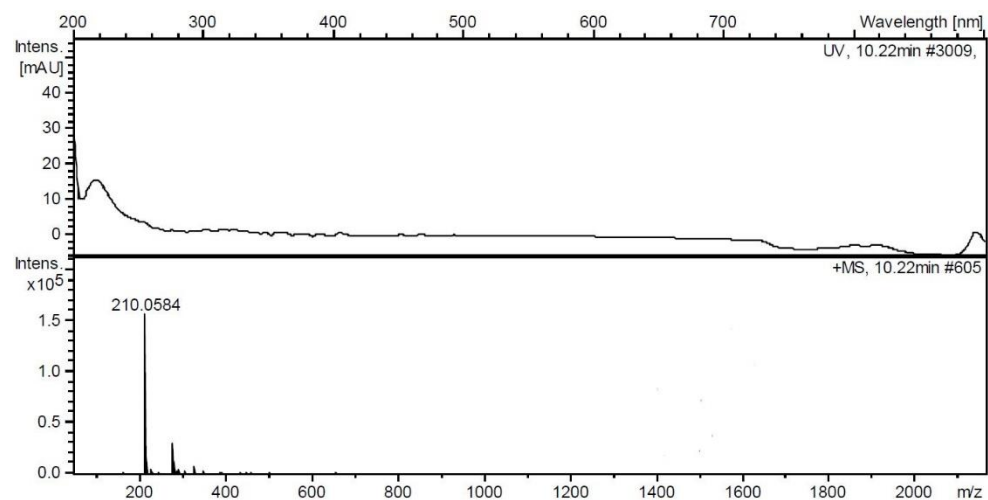

$C_{14}H_{16}N_2O_3S_2$  – Pyochelin

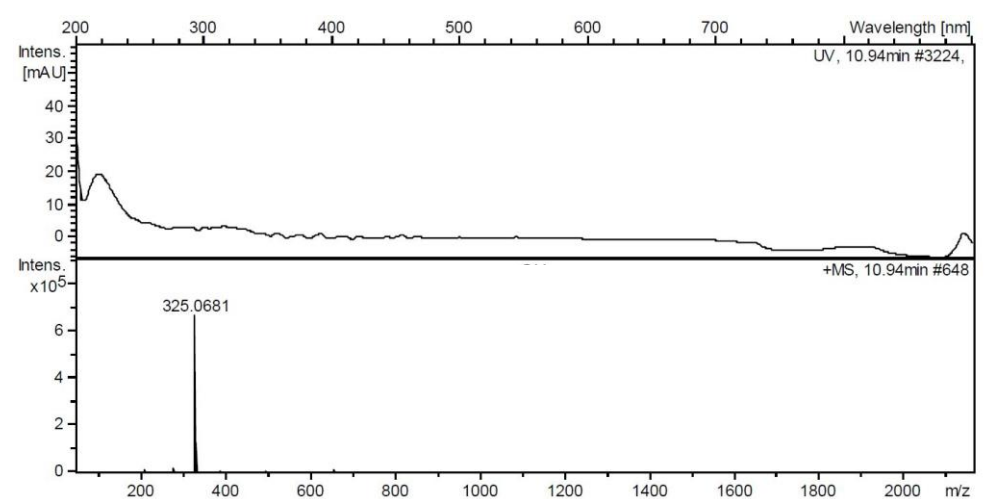

$C_{14}H_{10}O_4S$  – Ditropolonyl sulfide

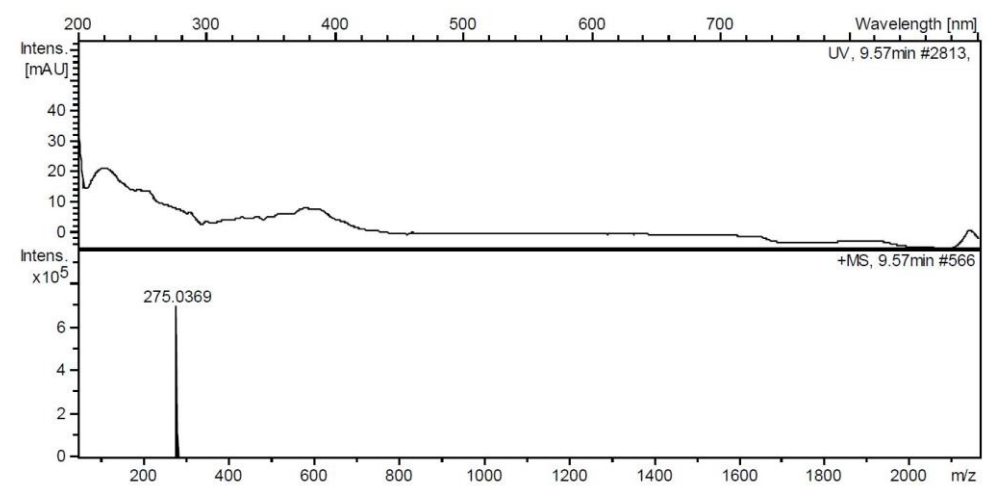

$C_{30}H_{56}N_8O_{13}$  – Ornibactin C8

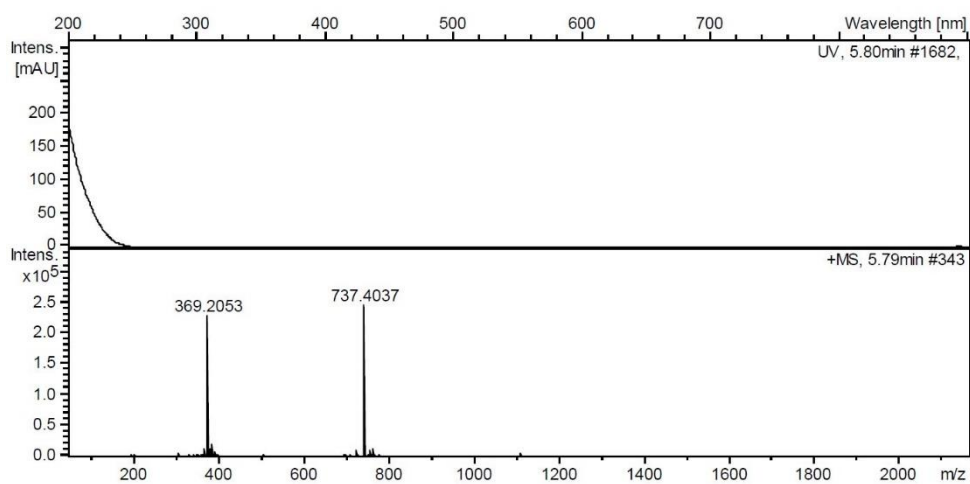

$C_{28}H_{52}N_8O_{13}$  – Ornibactin C6

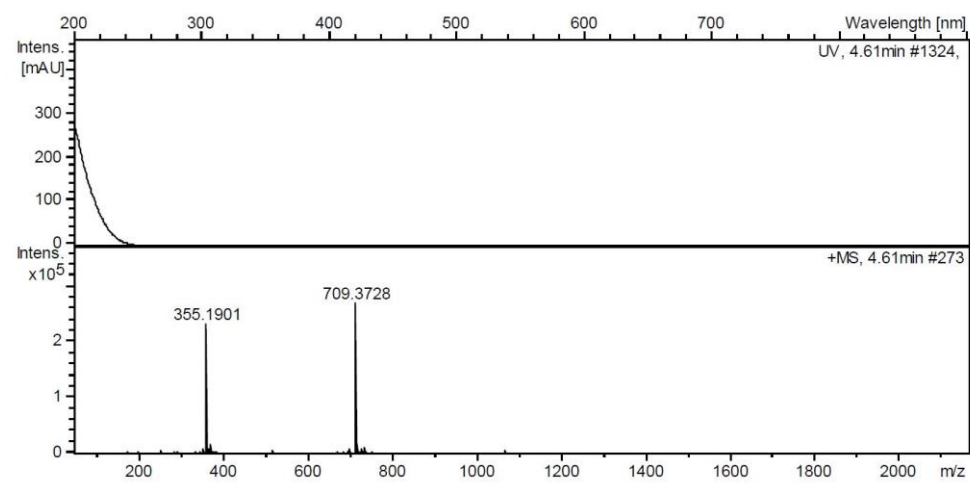

$C_{26}H_{48}N_8O_{13}$  – Ornibactin C4

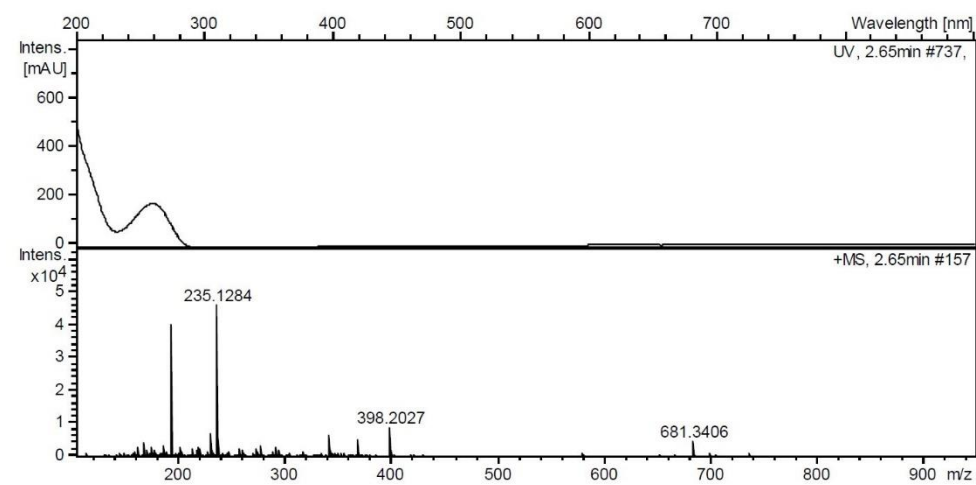

$C_{11}H_8Cl_2N_2O_4$  – 3-Chloro-4-(3-chloro-2-nitrophenyl)-1,5-dihydro-5-methoxy-2H-pyrrol-2-one

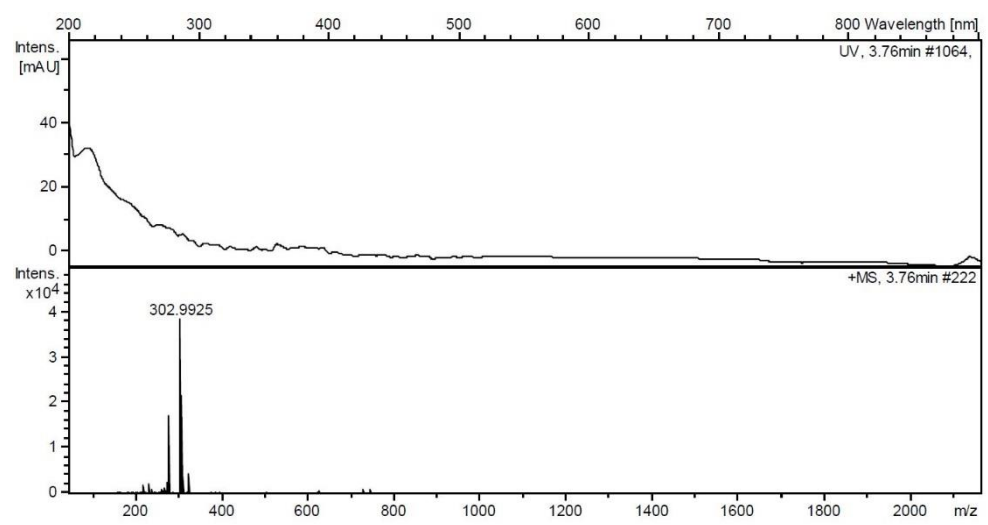

$C_{12}H_{12}O_4$  – Differolide

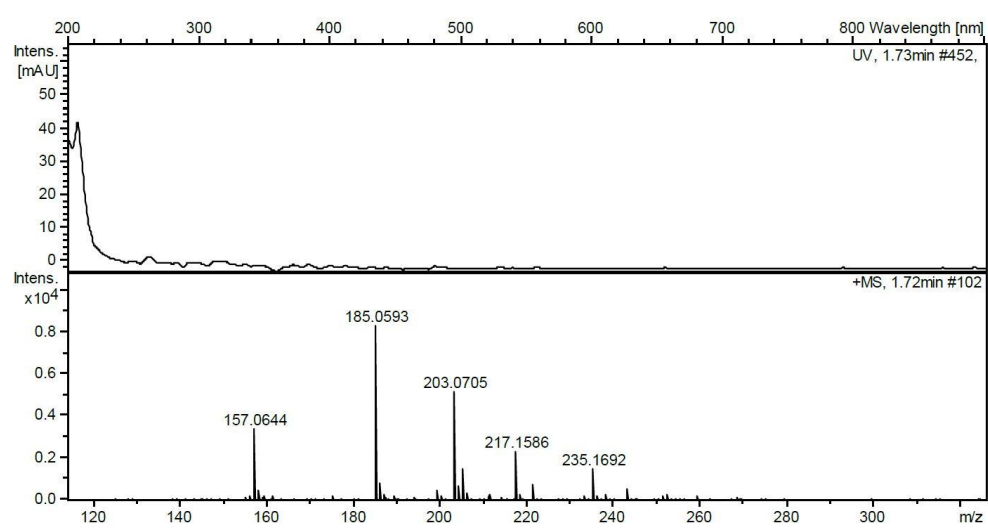



$C_{33}H_{47}Cl_2NO_{13}^*$  – Putative novel compound

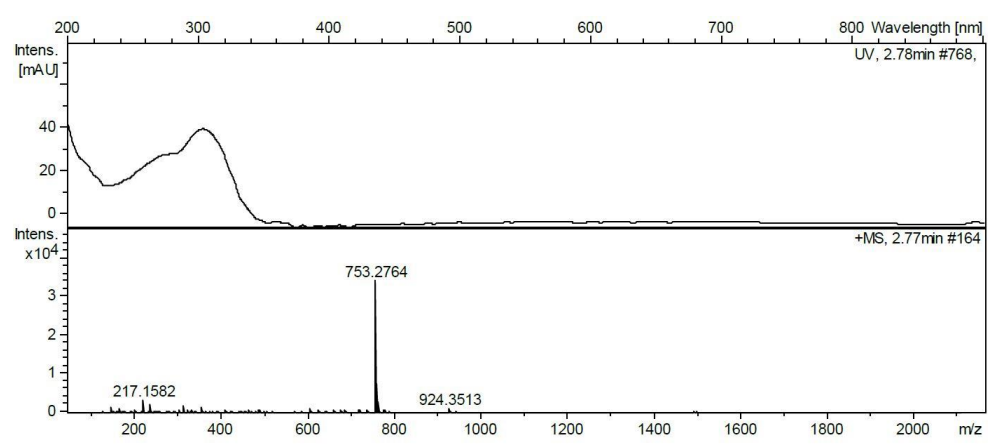

$C_{36}H_{64}N_4O_{10}^*$  – Putative novel compound

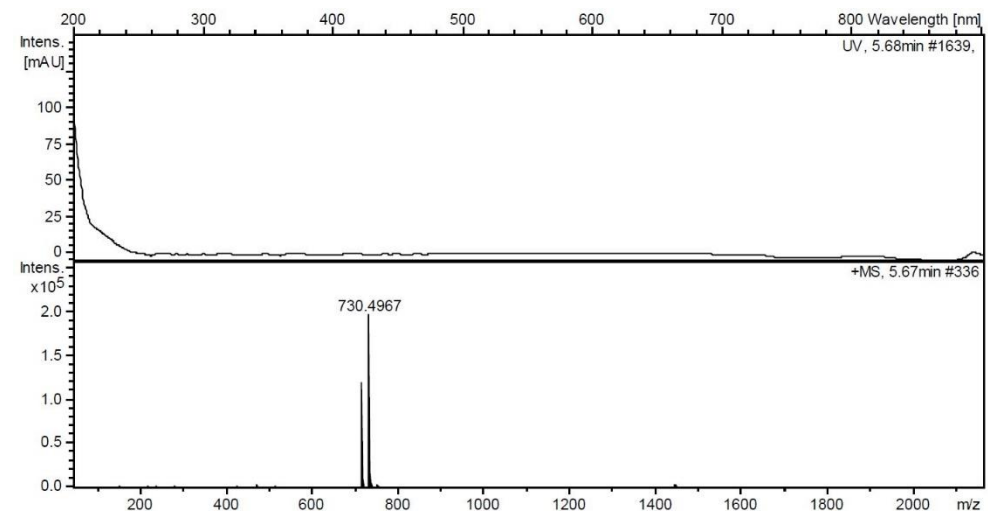

$C_{17}H_{27}Cl_2NO_7^*$  – Putative novel compound

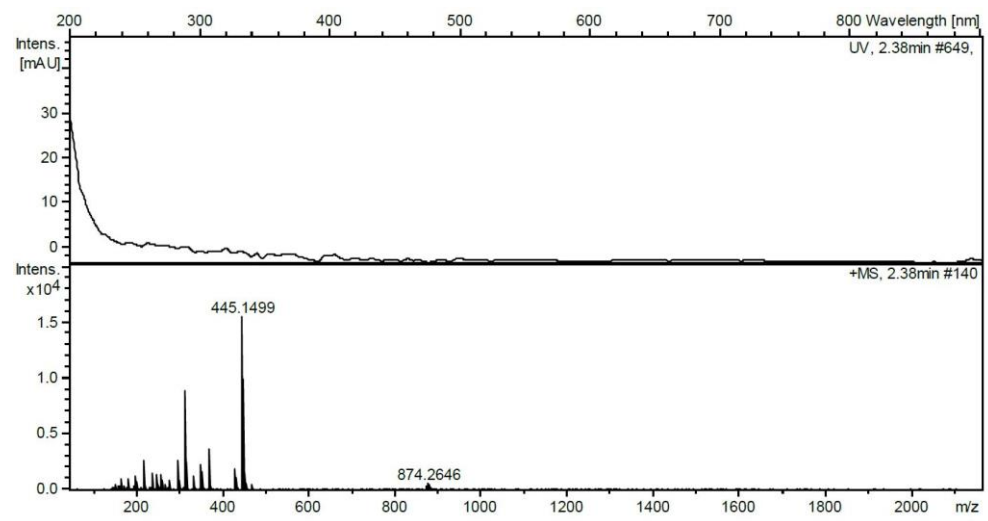

$C_7H_9N_5O_3^*$  – Putative novel compound

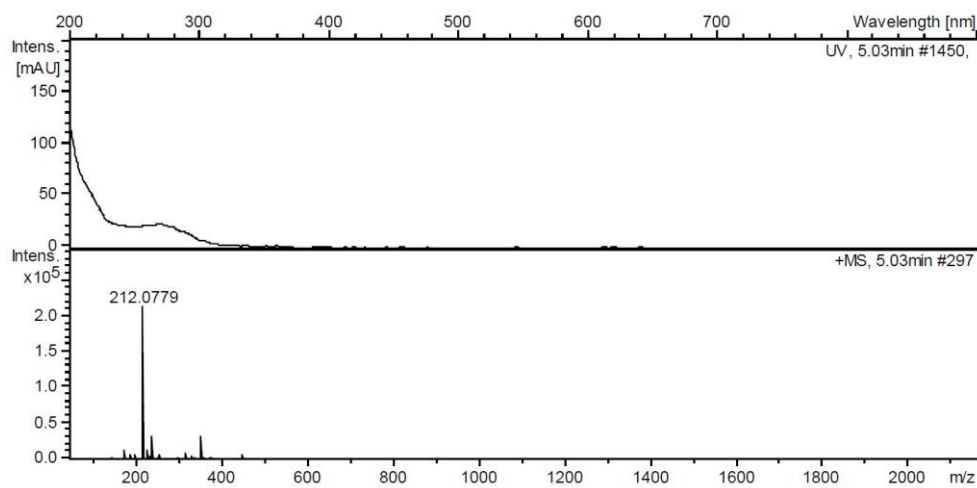

$C_9H_{21}NO_3^*$  – Putative novel compound

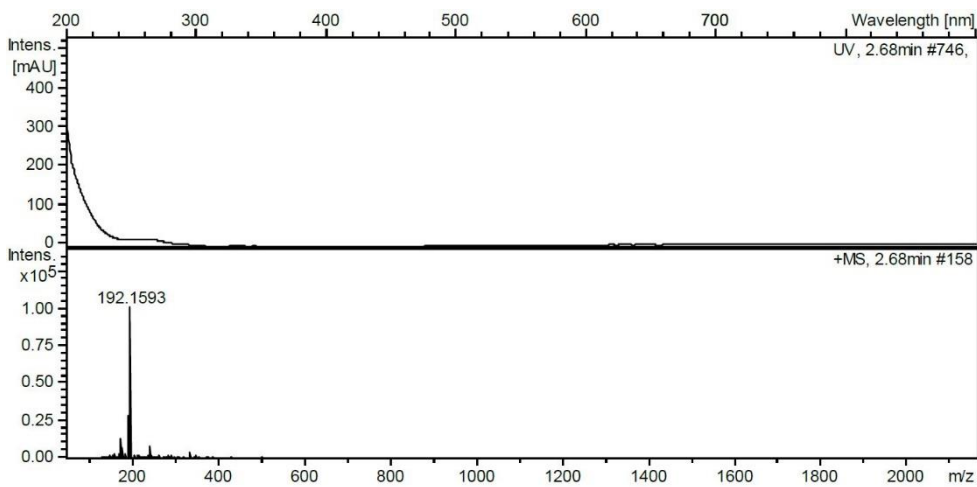

$C_{17}H_{25}N_3O_{13}^*$  – Putative novel compound

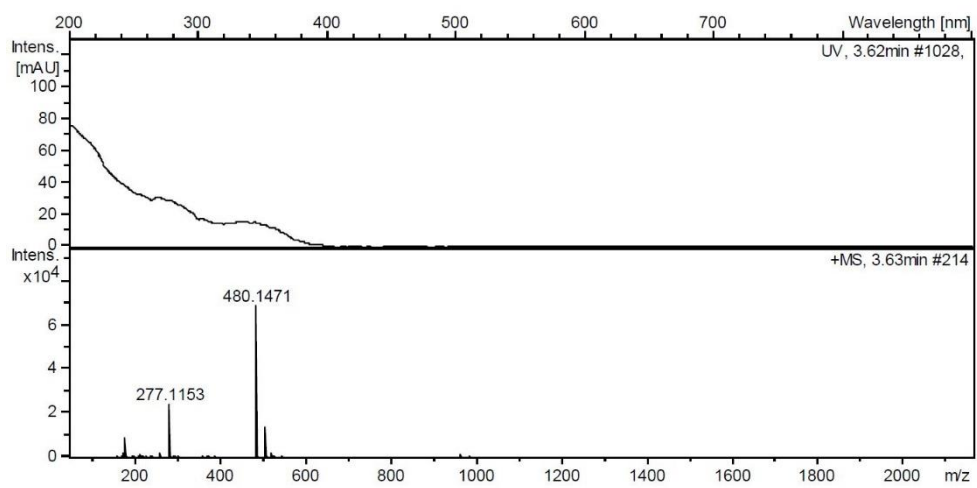

$C_{10}H_9NO_2^*$  – Putative novel compound

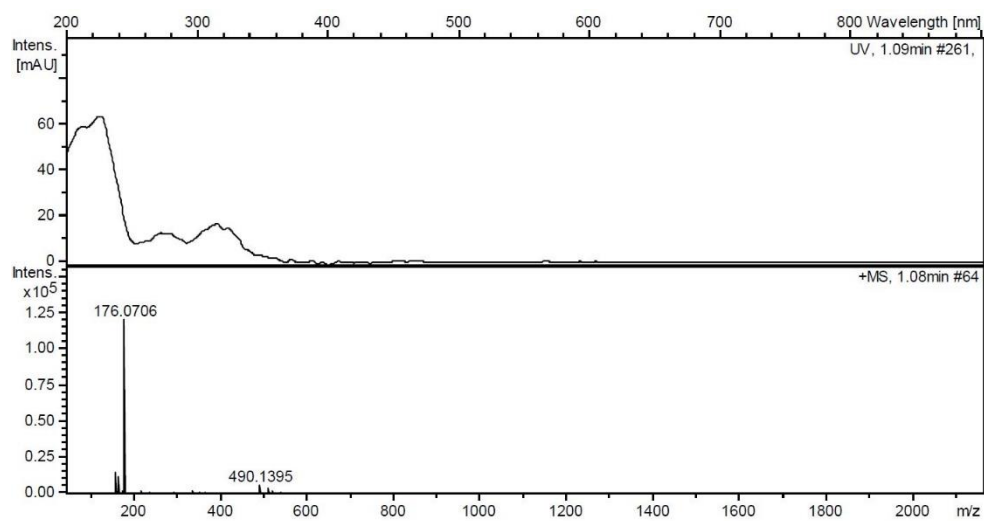

$C_{19}H_{13}N_5O_{12}S^*$  – Putative novel compound

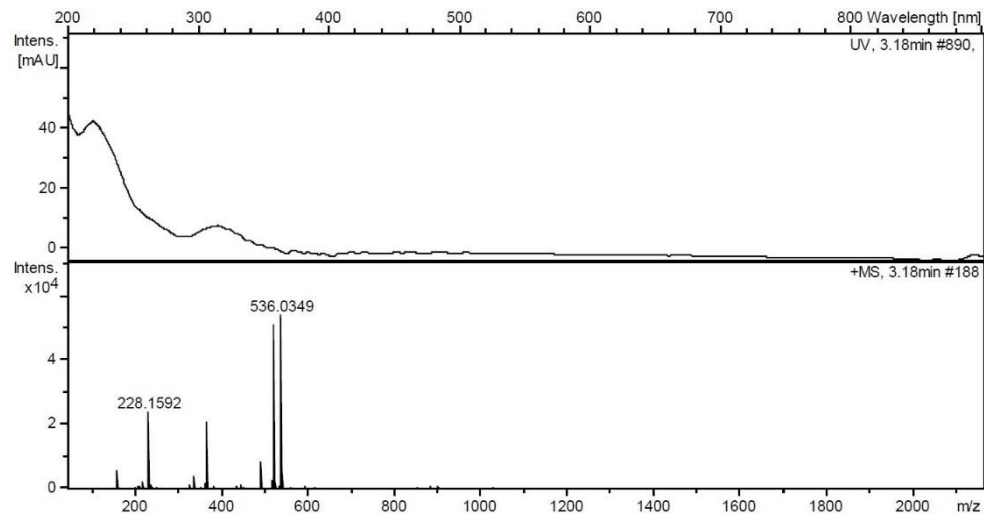

$C_9H_9NO_3^*$  – Putative novel compound

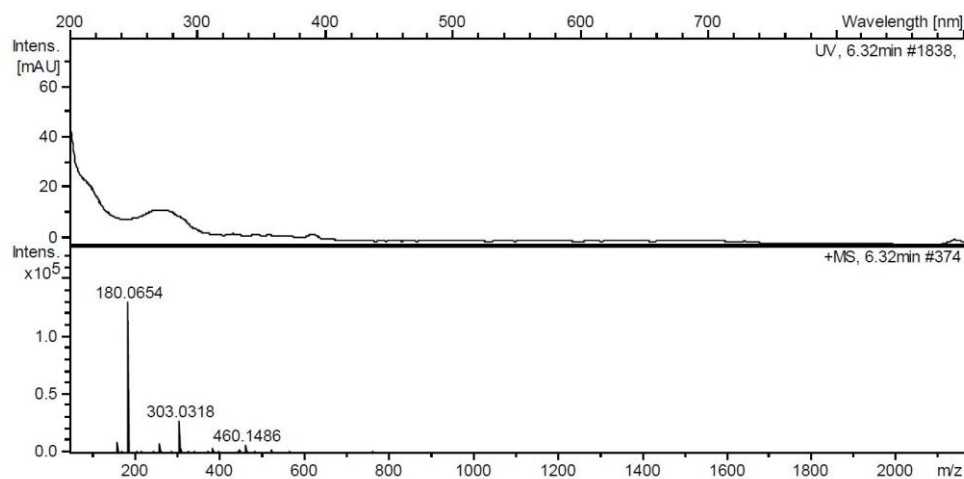

$C_{15}H_{12}O_6S^*$  – Putative novel compound

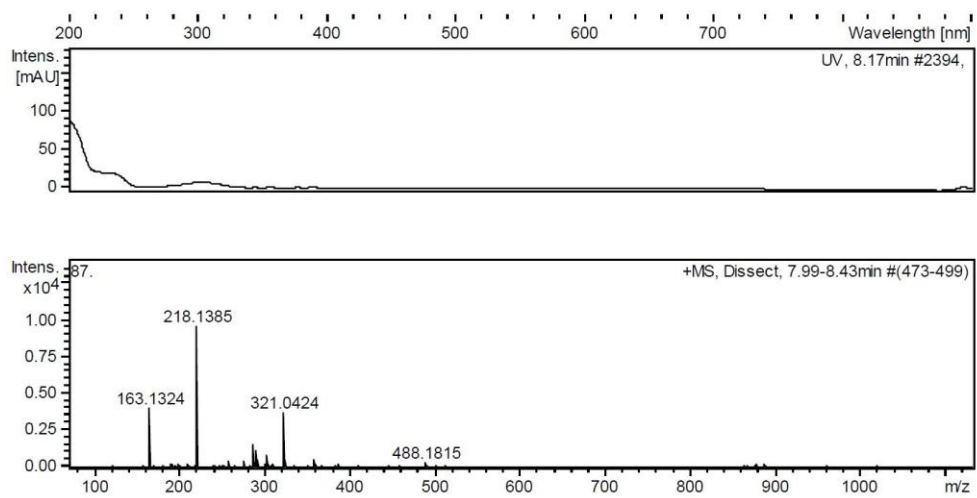

$C_{18}H_{33}N_3O_{12}^*$  – Putative novel compound

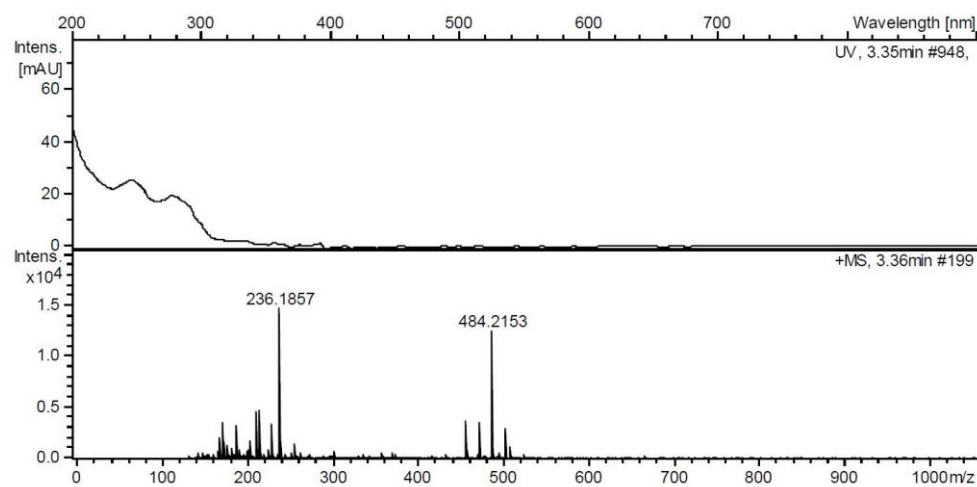

$C_{26}H_{42}O_7^*$  – Putative novel compound

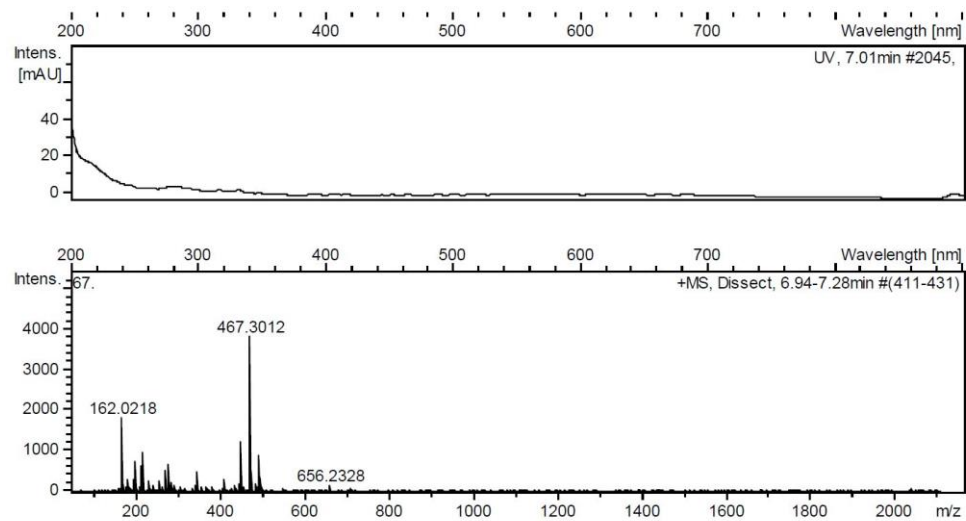

$C_{35}H_{39}N_9O_{11}^*$  – Putative novel compound

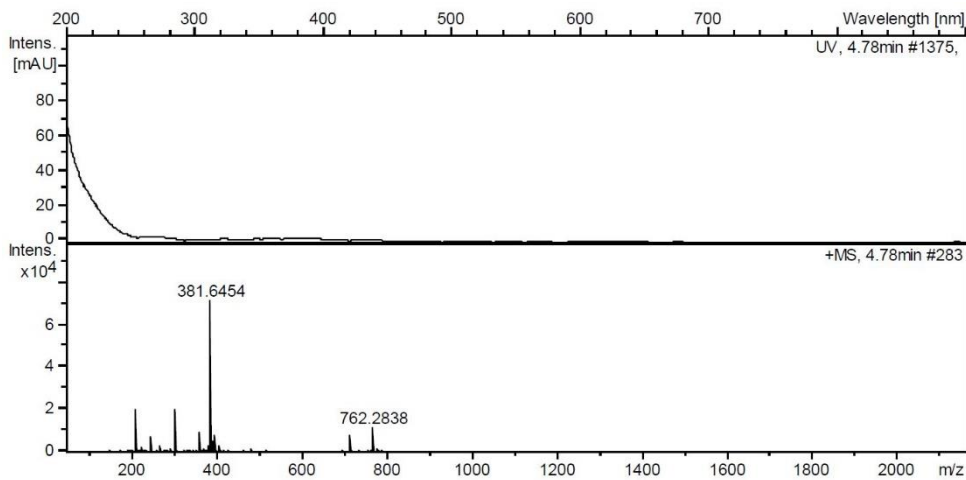

$C_{37}H_{43}N_9O_{11}^*$  – Putative novel compound

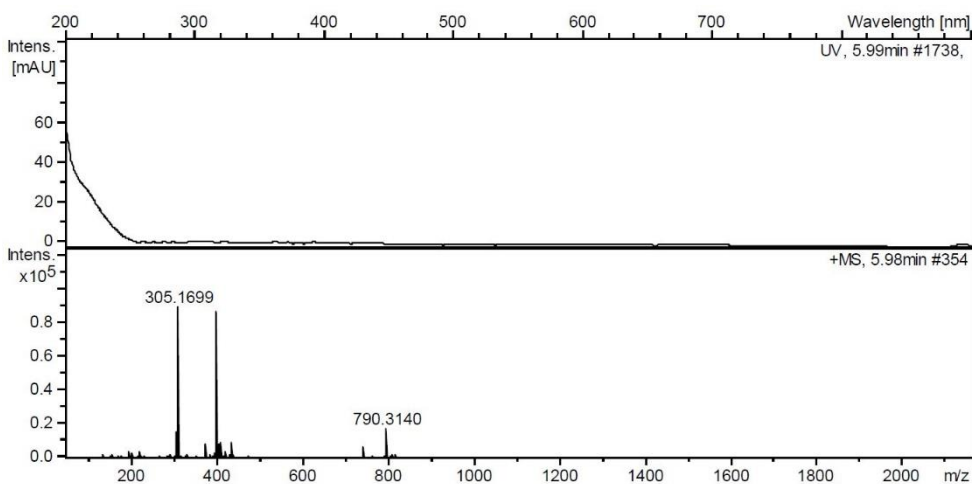

$C_{26}H_{48}N_8O_{14}^*$  – Putative novel compound

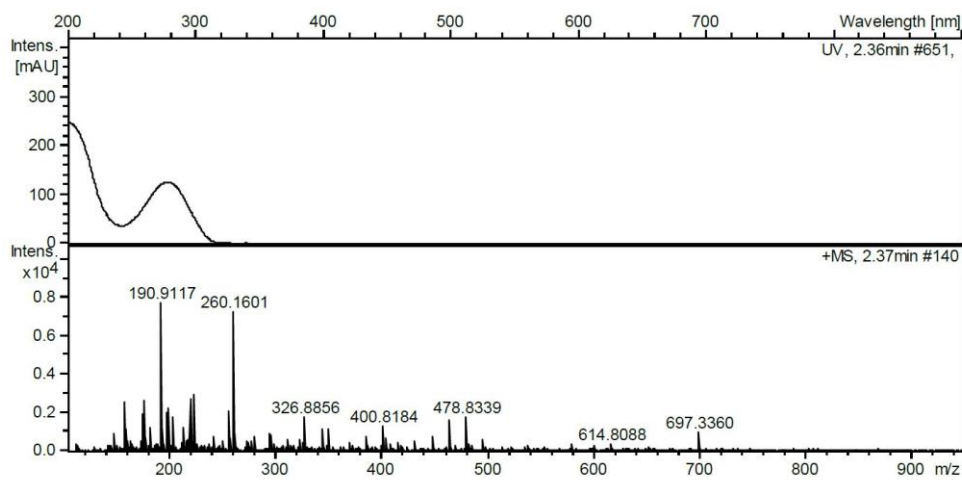

$C_{33}H_{35}N_9O_{11}^*$  – Putative novel compound

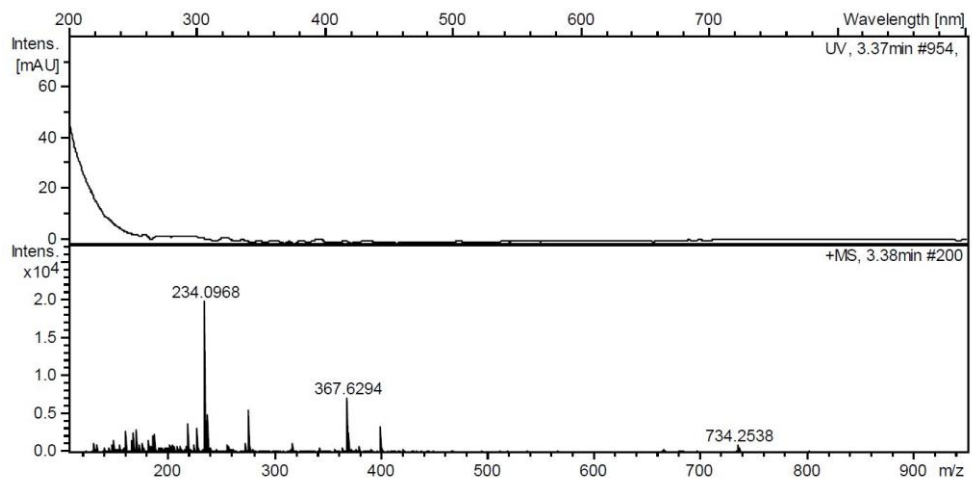

$C_{21}H_{25}FeNO_{15}S_2^*$  – Putative novel compound

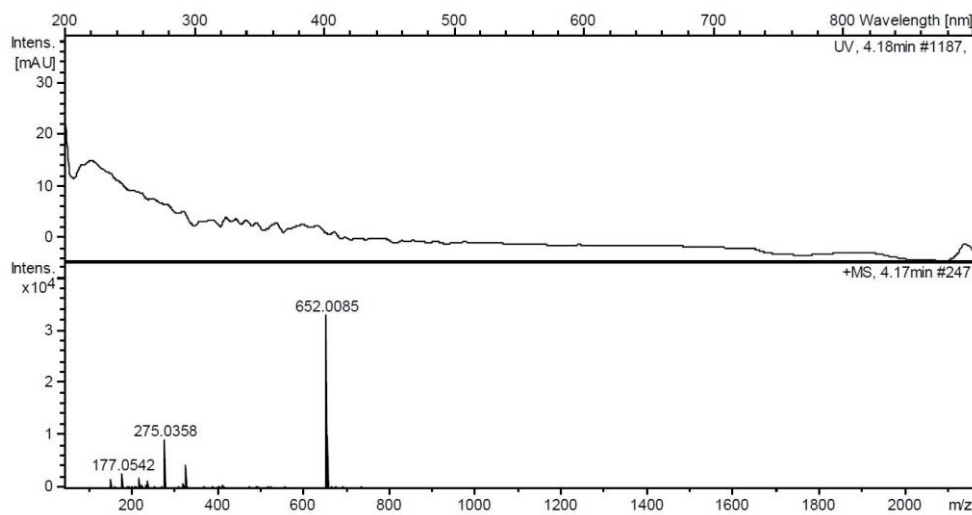

$C_{14}H_{14}O_3^*$  – Putative novel compound

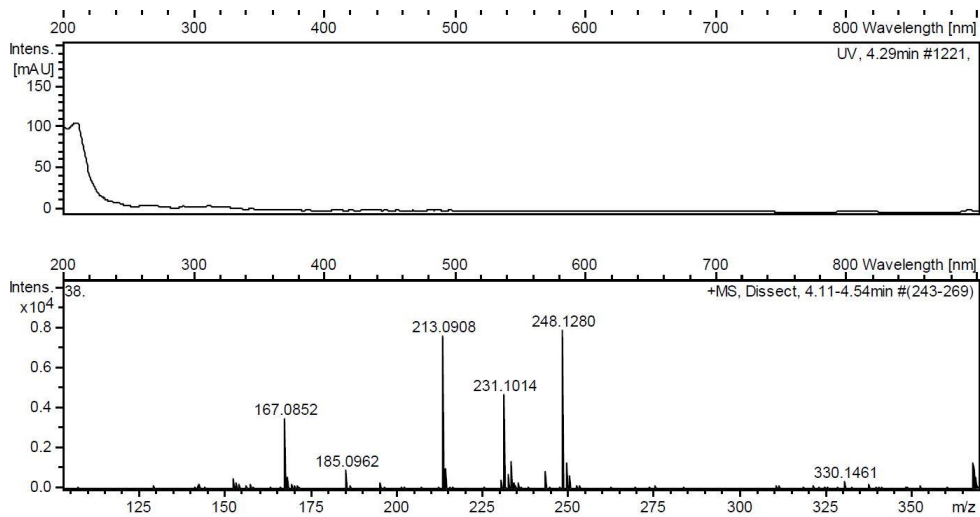

C<sub>16</sub>H<sub>22</sub>O<sub>3</sub>\* – Putative novel compound

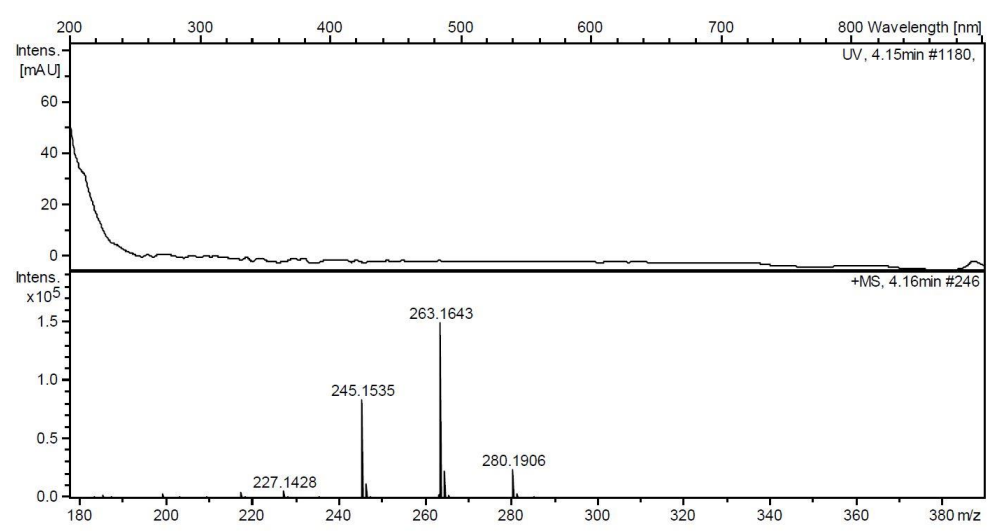

Supplement: s1 [file s1]
