# Supplementary material for: Burkholderia Bacteria Produce Multiple Potentially Novel Molecules that Inhibit Carbapenem-Resistant Gram-Negative Bacterial Pathogens
Source: MDPI journal article supplement (doi:10.3390/antibiotics10020147), 2021-02-02

**S2 Fig. Antimicrobial activity of semipreparative fractions of *Burkholderia gladioli* R-20794 and *Burkholderia singularis* LMG 28155.**

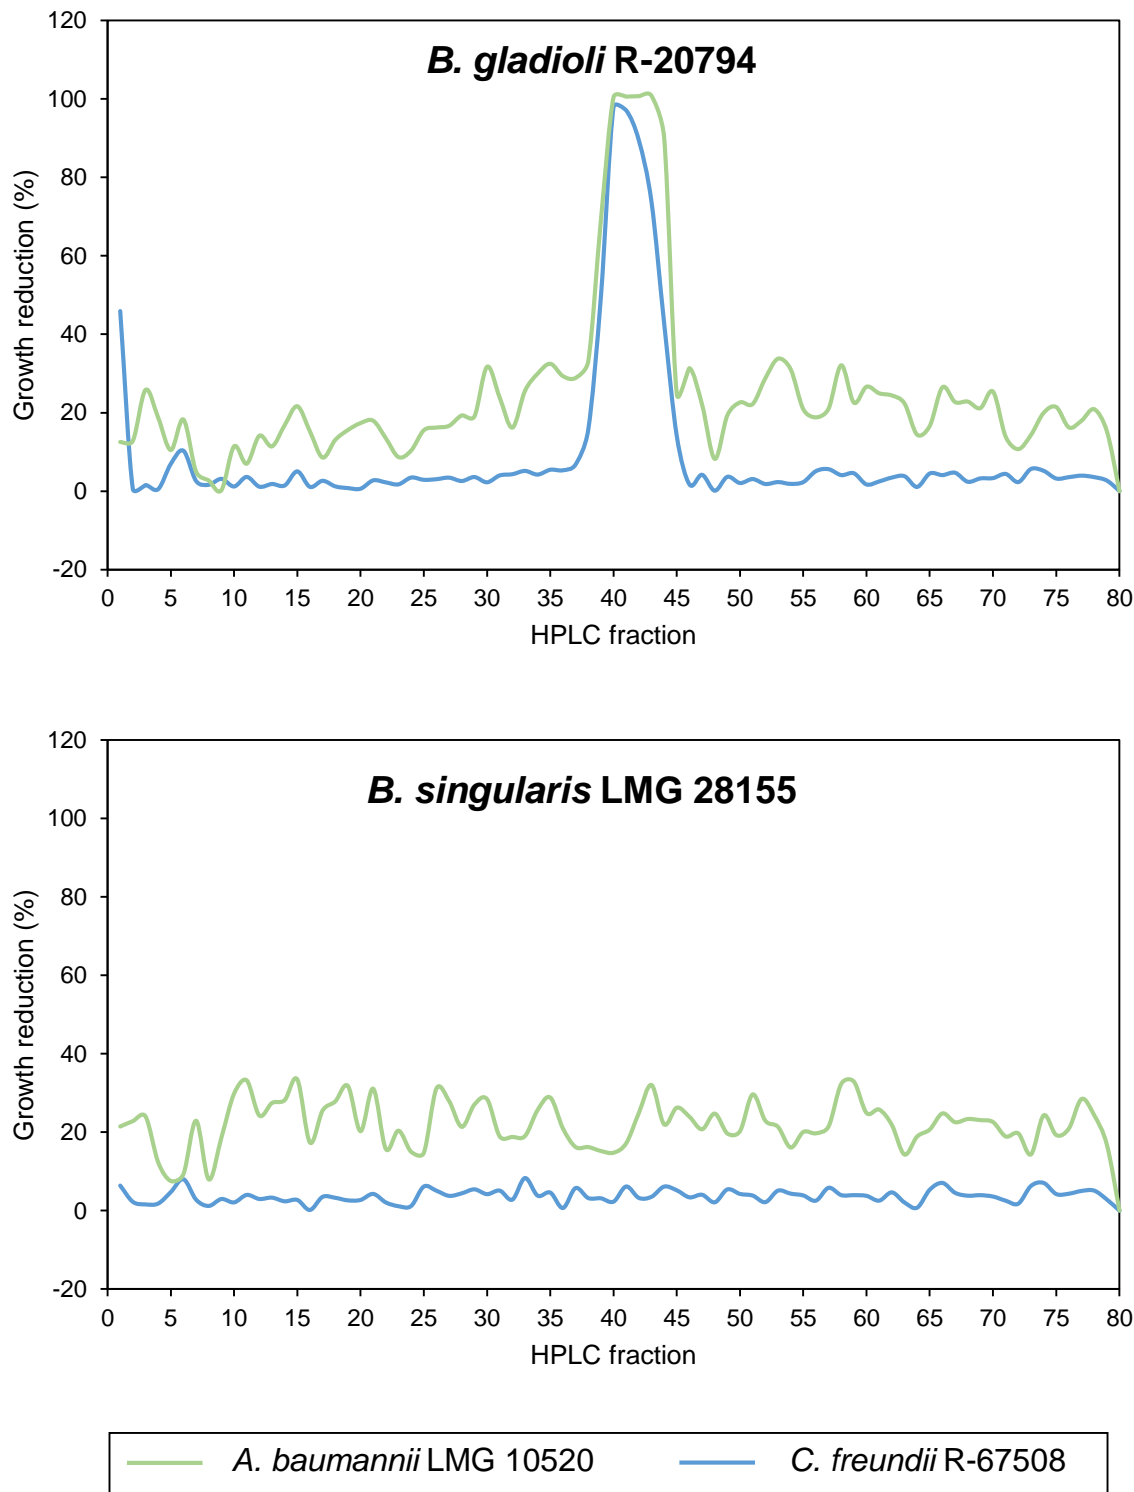

Supplement: s1 [file s1]
