# Supplementary material for: Burkholderia Bacteria Produce Multiple Potentially Novel Molecules that Inhibit Carbapenem-Resistant Gram-Negative Bacterial Pathogens
Source: MDPI journal article supplement (doi:10.3390/antibiotics10020147), 2021-02-02
Supplement: s1 [file s1]

**S3 Fig. Semipreparative fractionation chromatograms of eight *Burkholderia* isolates.** Fractions subsequently analyzed via LC-HRMS are indicated with 'f' and a number, corresponding to the fractions listed in Table 4.

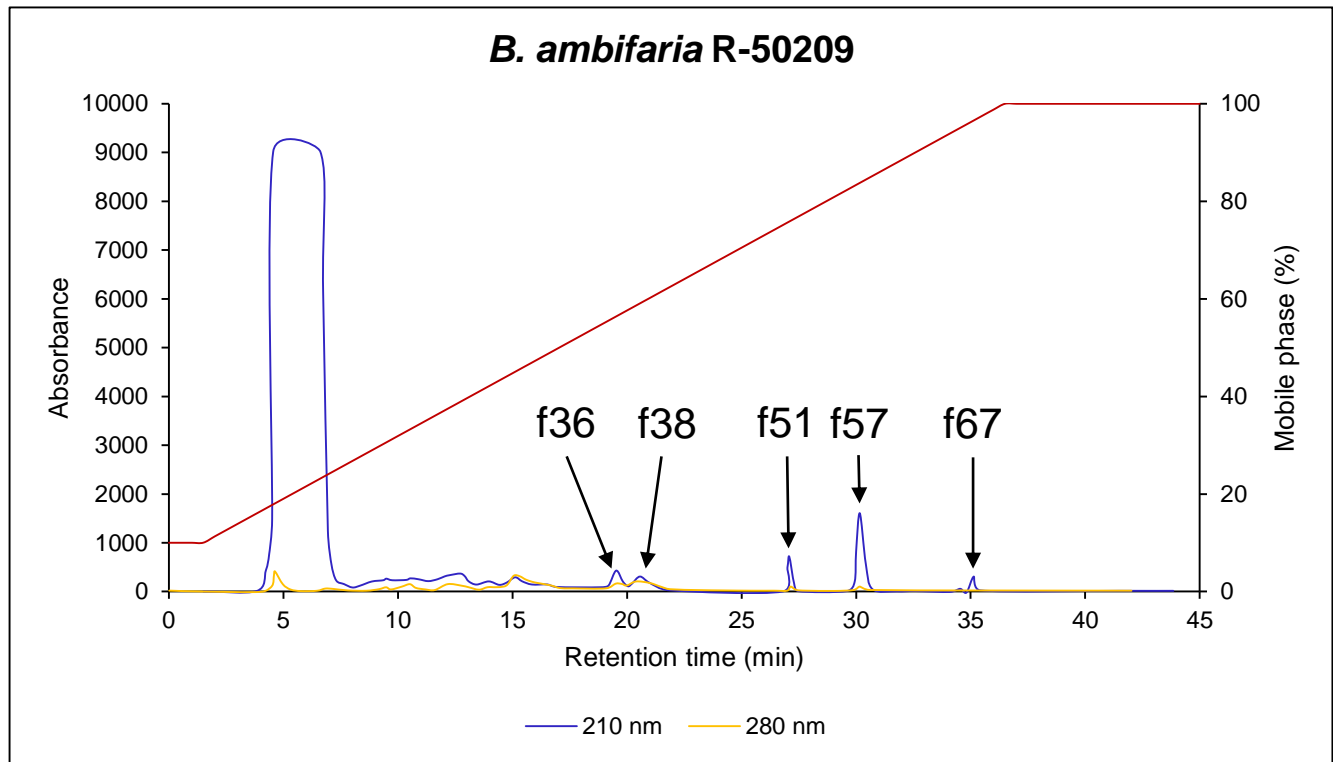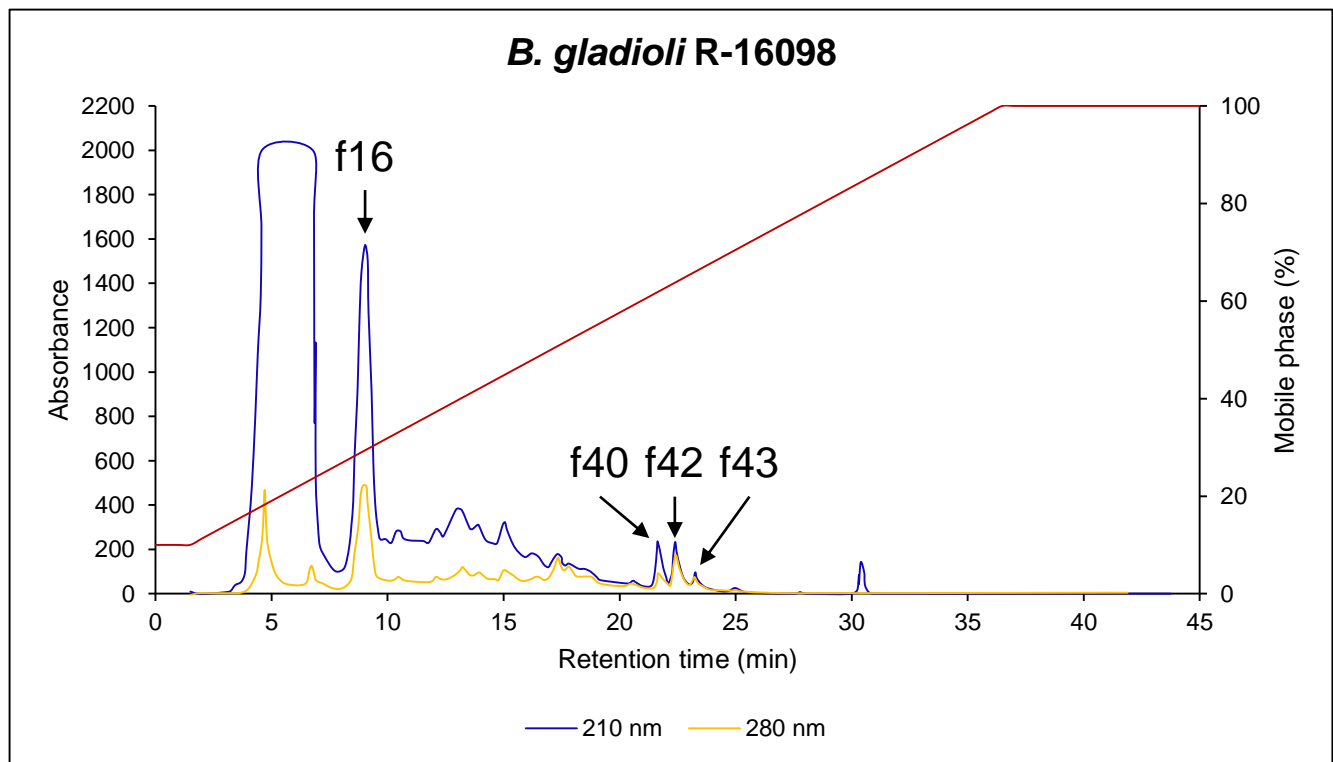

***B. gladioli* R-20794**

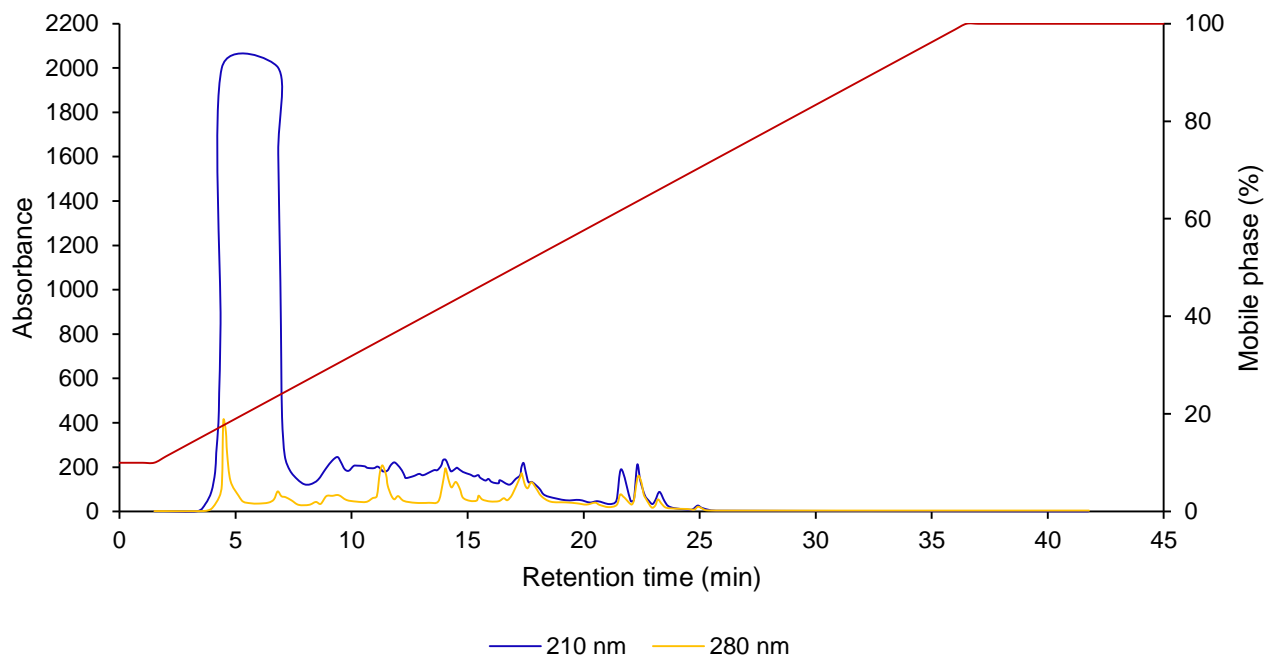

Due to similarity of the profile with strain R-16098, none of the fractions were analyzed via HR-LCMS,

***B. glumae* R-1678**

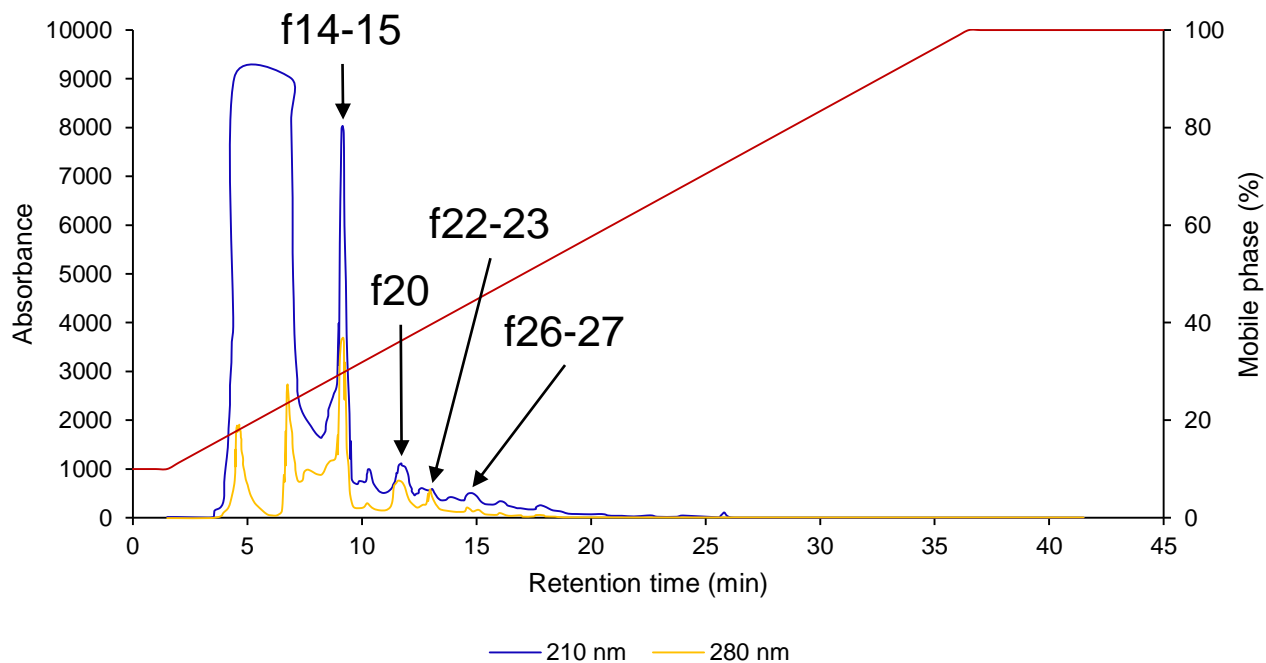

***B. cepacia* R-24575**

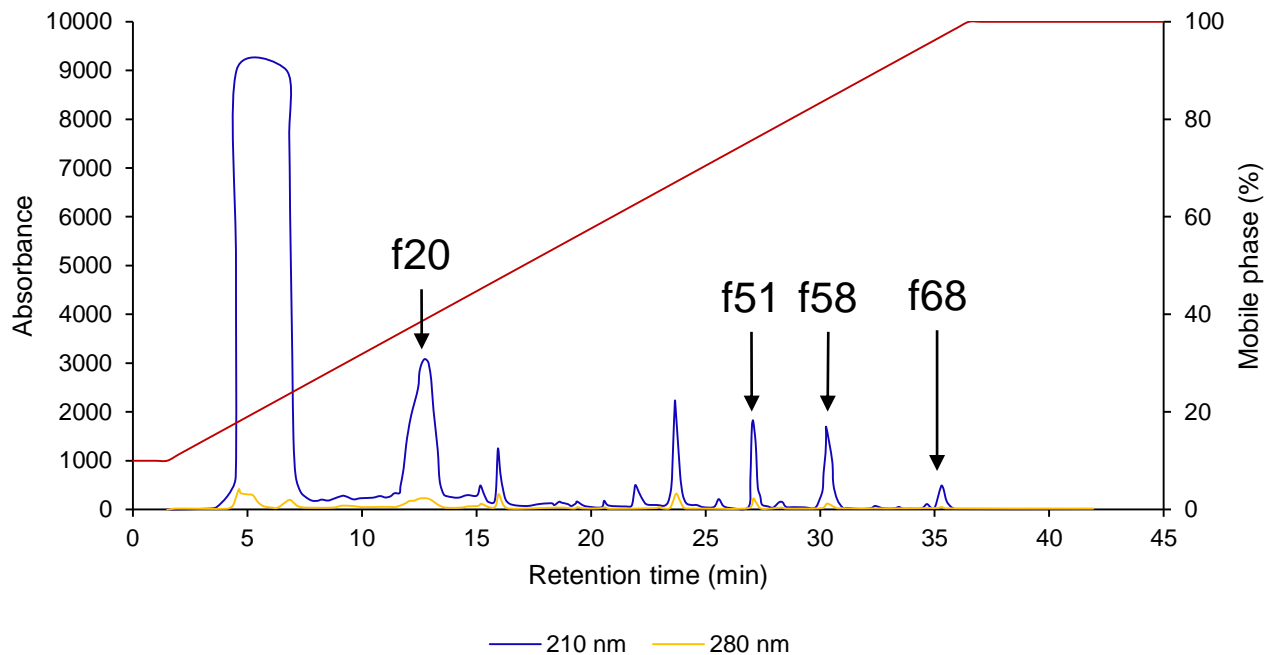

**Other Bcc I R-12632**

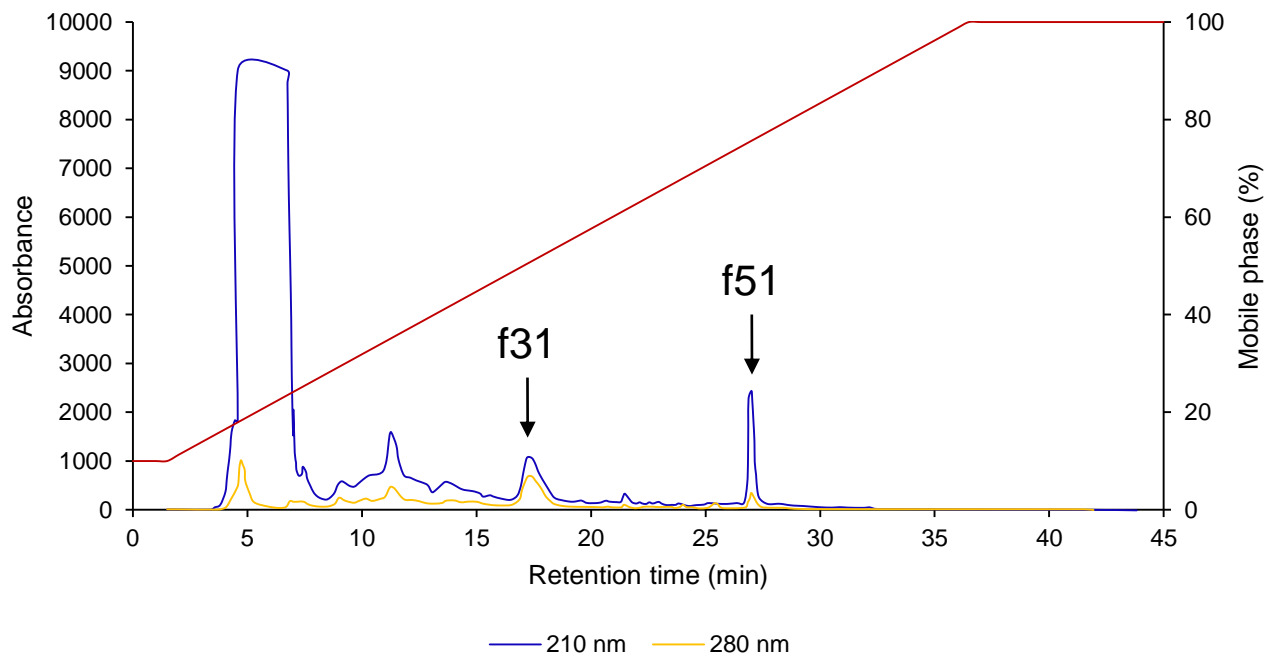

### Other Bcc I R-14280

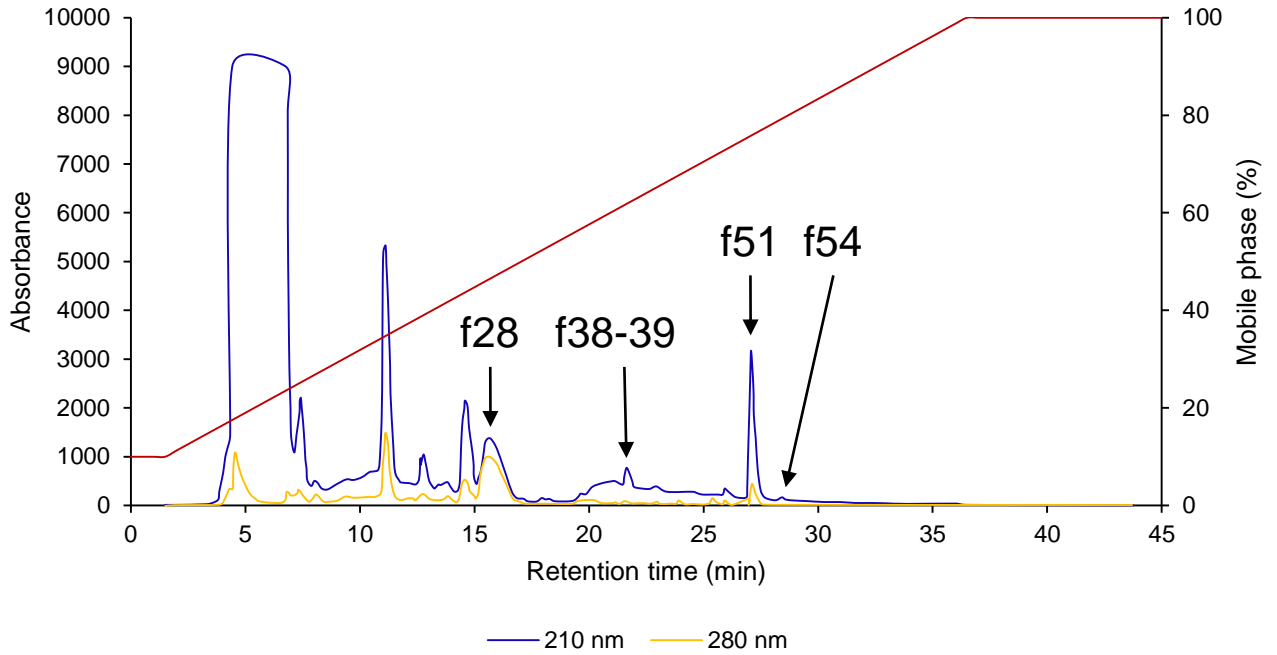

### *B. singularis* LMG 28155

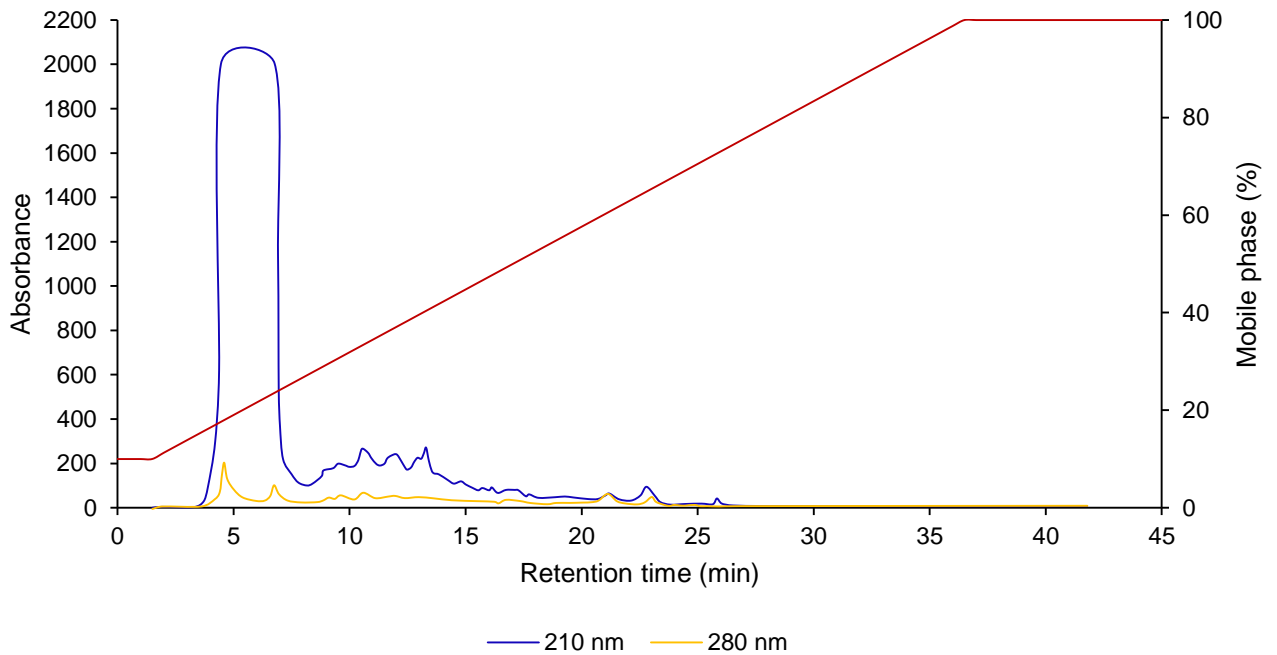

Because none of the fractions showed >40% growth inhibition of at least one of the two pathogens tested, none of the fractions were analyzed through HR-LCMS,
