# Supplementary material for: Burkholderia Bacteria Produce Multiple Potentially Novel Molecules that Inhibit Carbapenem-Resistant Gram-Negative Bacterial Pathogens
Source: Antibiotics (Basel). 2021 Feb 2;10(2):147. doi: 10.3390/antibiotics10020147 (PMC7912996; doi:10.3390/antibiotics10020147)
Supplement: Supplementary file 1 [file antibiotics-10-00147-s001.zip]

Archive with 5 entries (5 files):
- Figure S1.pdf
- Table S1.xlsx
- Figure S2.pdf
- Table S2.xlsx
- Figure S3.pdf
