# Supplementary material for: Burkholderia Bacteria Produce Multiple Potentially Novel Molecules that Inhibit Carbapenem-Resistant Gram-Negative Bacterial Pathogens
Source: Antibiotics (Basel). 2021 Feb 2;10(2):147. doi: 10.3390/antibiotics10020147 (PMC7912996; doi:10.3390/antibiotics10020147)
Supplement: Supplementary file 1 [file antibiotics-10-00147-s001.zip › Table S2.xlsx]

## Sheet: Supplementary_Table2
Order	Species	Strain	Alias	Depositor	Resistance	Overlay protocol
1	Staphylococcus aureus	LMG 10147	ATCC 29213	LMG	Methicillin sensitive	A
2	Acinetobacter baumannii	LMG 10520		LMG		A
3	Candida albicans	SC5314	ATCC MYA-2876	ATCC		C
4	Staphylococcus aureus	R-23902	ATCC 700699; mu50	ATCC	Vancomycin intermediate	A
5	Staphylococcus aureus	R-67513	MI03055681	H. Goossens	Methicillin resistant	A
6	Staphylococcus aureus	LMG 15975	ATCC 43300	LMG	Methicillin resistant	A
7	Enterococcus faecium	LMG 11423T	ATCC 19434T	LMG	Vancomycin sensitive	A
8	Enterococcus faecium	LMG 16003	DSM 2146	LMG	Vancomycin resistant	A
9	Enterococcus faecium	LMG 17188		LMG	Vancomycin resistant	A
10	Clostridium difficile	R-67524	MI09086234	H. Goossens		B
11	Clostridium difficile	R-67525	MIOI90930	H. Goossens		B
12	Clostridium difficile	R-67526	MI10036123	H. Goossens		B
13	Acinetobacter baumannii	R-67511	239sp	H. Goossens	OXA-23 like beta-lactamase	A
14	Acinetobacter baumannii	R-67512	70pus	H. Goossens	OXA-24 like beta-lactamase	A
15	Acinetobacter baumannii	LMG 22452	UZG S91 02796	LMG	Tetracyclin resistant	A
16	Pseudomonas aeruginosa	LMG 6395	ATCC 27853	LMG		A
17	Pseudomonas aeruginosa	LMG 27622	LESB58; ATCC 15692	LMG		A
18	Pseudomonas aeruginosa	LMG 27638	PAO1	LMG		A
19	Enterobacter cloacae	R-67504	MI13035761-2	H. Goossens	OXA-48 beta-lactamase	A
20	Enterobacter aerogenes	R-67505	MI15036931	H. Goossens	OXA-48 beta-lactamase	A
21	Enterobacter cloacae complex	R-67510	MI14074864	H. Goossens	BIC-1 beta-lactamase	A
22	Klebsiella pneumoniae	LMG 2095T	ATCC 13883T	LMG		A
23	Klebsiella pneumoniae	LMG 20218	ATCC 700603	LMG		A
24	Klebsiella pneumoniae	LMG 29428		LMG	OXA-48 beta-lactamase	A
25	Citrobacter freundii	R-67508	MI15041861	H. Goossens	OXA-48 beta-lactamase	A
26	Escherichia coli	R-67507	MI14120017	H. Goossens	OXA-48 beta-lactamase	A
27	Escherichia coli	R-67506	MI14090752	H. Goossens	OXA-48 beta-lactamase	A
28	Morganella morganii	R-67509	MI12071890	H. Goossens	OXA-48 beta-lactamase	A
29	Candida glabrata	MUCL 15664	DBVPG 7240	MUCL	Miconazole resistant	C
30	Candida glabrata	MUCL 29833T	ATCC 2001T	MUCL		C
31	Candida glabrata	R-67518	UZ1	Own isolate		C
32	Candida krusei	R-66630	ATCC 6258	ATCC	Azole resistant	C
33	Candida krusei	R-67515	P10CK1	Own isolate	Azole resistant	C
34	Candida krusei	R-67514	CK62SP	Own isolate	Azole resistant	C
35	Aspergillus fumigatus	R-67519	IHEM 2494	IHEM		D
36	Aspergillus fumigatus	R-67520	ATCC MYA-3627	ATCC	Itraconazole resistant	D
37	Aspergillus fumigatus	IHEM 17905	AF1112	IHEM	Itraconazole resistant	D

## Sheet: Caption
Supplementary Table 2. Pathogens used in antimicrobial activity assays. LMG, BCCM/LMG Bacteria Collection, Belgium; ATCC, American Type Culture Collection, USA; MUCL, BCCM/MUCL Agro-food and Environmental Fungal Collection, Belgium; IHEM, BCCM/IHEM Fungi Collection: Human & Animal Health.
